# Supplementary material for: Reconstructing Legal Responsibility for AI: A Structural Model and Case-Based Analysis from China
Source: Research Square preprint supplement (doi:10.21203/rs.3.rs-7024324/v1), 2025-10-20
Supplement: Supplementary file 1 [file c1147d691aee719efb27cc1d.docx]

Appendix A. Coding Dimensions and Legal Attribution Functions

*This framework defines each analytical dimension (A1–A6) and outlines the legal question and attribution logic it addresses. It forms the basis for systematic case and regulation analysis.*

| Code | Dimension Title | Legal Question Addressed | Analytical Purpose (Function) |
| --- | --- | --- | --- |
| A1 | Behavioral Capacity | Does the system’s conduct constitute legally relevant “action”? | Evaluate whether AI behavior exhibits recognizable functional agency. |
| A2 | Attribution Chain | How is responsibility traced across input–output structures? | Map causality between system input, execution, and legal effect. |
| A3 | Legal Personhood Framing | Is the system treated as a legal subject or merely a tool? | Determine how legal language frames the AI system. |
| A4 | Institutional Legal Response | Does current law accommodate non-agent systems? | Examine adequacy and innovation in legal responses. |
| A5 | Societal Value Conflicts | What policy tensions arise (efficiency vs. justice)? | Reveal normative trade-offs behind legal rules and judgments. |
| A6 | Attribution Legitimacy Logic | How is liability justified without subjectivity? | Explore functional, cybernetic, or proxy-based attribution paths. |

Appendix B. Comparison: Traditional vs. Constructive Attribution Models

*This matrix contrasts conventional liability frameworks with the constructive attribution model proposed in this study. It highlights the evolving roles of legal subjectivity, control architecture, and responsibility interfaces.*

| Dimension | Traditional Legal Path | Constructive Attribution Path (Proposed) | Manifestation in Practice |
| --- | --- | --- | --- |
| Attribution Logic | Legal subject → conduct → liability | Control structure → functional behavior → interface liability | Responsibility mapped via control chains and legal proxies |
| Legal Subjectivity | Human-centered, intent-based | Tool/system-centered, control-based | Functional framing of non-agent systems |
| System Position | Neutral instrument | Behavioral node within legal structure | System output treated as legally relevant event |
| Liability Mode | Single-subject responsibility | Multi-party + system-triggered attribution | Developers, platforms, users share attribution burden |
| Legal Response Path | Legacy law for natural persons | Constructed rules + control-based triggers | Product liability reforms, platform governance models |
| Global Trend | Actor-centric → technological assist | De-subjectified → control-enhanced liability | Seen in EU AI Act, China’s algorithm rules |

Appendix C. Case and Regulation Coding Matrix

*This table summarizes the attribution dimensions assigned to representative court cases and regulatory texts. Codes refer to the analytical dimensions from Appendix A.*

| **ID** | **Type** | **Case / Regulation Title** | **Coded Dimensions** | **Key Subcategories** | **Summary Explanation** |
| --- | --- | --- | --- | --- | --- |
| C1 | Case | Platform Dispatch & Employment Dispute (Ningbo) | A1, A2, A3, A5, A6 | Algorithmic control, non-person framing, risk allocation, functional attribution | Platform algorithm equated with de facto employer |
| C2 | Case | Blockchain Evidence Case | A1, A3, A4 | Automated execution, non-person registry, legal vacuum | Court accepted data immutability, denied behavioral personhood |
| C3 | Case | Smart Judicial Assistant (Guangzhou) | A1, A2, A5, A6 | Human–machine interaction, efficiency vs. rights, control-based delegation | AI treated as advisory; responsibility retained by human judge |
| C4 | Case | Generative AI Portrait Case (Beijing) | A1–A6 | Prompt-based causality, control obligation, non-person framing | Platform held liable for AI-generated likeness misuse |
| C5 | Case | Tesla Autopilot Fatality (US) | A1–A6 | Functional execution, unintended behavior, non-person framing, control-based logic | System failed to brake; court denied AI agency; user retained duty to monitor |
| L1 | Law | EU Artificial Intelligence Act | A4, A5, A6 | Regulatory innovation, risk-tiered control models | Classifies high-risk systems, mandates traceability |
| L2 | Law | EU Product Liability Directive (Revised Draft) | A1, A2, A4 | Functional output recognition, causality expansion | Considers AI a product with extended liability scope |
| L3 | Law | US Communications Decency Act §230 | A3, A5 | Non-agent framing, innovation vs. legal shield | Grants platform immunity for user-generated content |
| L4 | Law | China’s Generative AI Governance Measures | A2, A4, A5 | Multi-party attribution, compliance duties | Mandates notification–response governance model |
